# Supplementary material for: Robust ionic liquid/ethanolamine-superbase solvents enable rapid, efficient and mild dissolution of lignocellulosic biomass
Source: Royal Society of Chemistry journal article supplement (doi:10.1039/d3gc00783a), 2023-01-01
Supplement: d3gc00783a1.pdf [file d3gc00783a1.pdf]

Supplementary Information for

**Robust Ionic Liquid/Ethanolamine-Superbase Solvents Enable Rapid, Efficient  
and Mild Dissolution of Lignocellulosic Biomass**

Yang Wang,<sup>a</sup> Huan Wang,<sup>b</sup> Lan Chen,<sup>a</sup> Weitao Wang,<sup>b</sup> Zhaohui Yang,<sup>c</sup> Zhimin Xue<sup>\*a</sup> and Tiancheng Mu<sup>\*c</sup>

<sup>a</sup> Beijing Key Laboratory of Lignocellulosic Chemistry, Beijing Forestry University, Beijing, 100083, China.

<sup>b</sup> Shaanxi Key Laboratory of Chemical Additives for Industry, College of Chemistry and Chemical Engineering, Shaanxi University of Science & Technology, Xi'an, 710021, China.

<sup>c</sup> Department of Chemistry, Renmin University of China, Beijing 100872, China.

\*Corresponding author: [zmxue@bjfu.edu.cn](mailto:zmxue@bjfu.edu.cn) (Z. Xue), [tcmu@ruc.edu.cn](mailto:tcmu@ruc.edu.cn) (T. Mu)

### Kamlet-Taft LSER method

The linear relationship between lignin solubility and KT parameter was determined by fitting a linear solvation energy relationship (LSER) using multiple linear regression according to our previous work and other literature.<sup>1, 2</sup> In this work, the maximum p-value used was 0.05, and multiple linear regression was expressed by the following equation:

$$\ln S = XYZ_0 + a\alpha + b\beta + c\pi^* \quad (1)$$

where a, b and c are coefficients of each parameter and  $XYZ_0$  is intercept. Multiple linear regressions were performed on all the different variables  $[(\alpha, \beta, \pi^*), (\alpha, \beta), (\alpha, \pi^*), (\beta, \pi^*), (\alpha), (\beta), (\pi^*)]$  to determine the coefficients, and correlations were accepted if the variables all proved statistically significant ( $p < 0.05$ ). Otherwise, there is no correlation.

**Table S1** Solubilities (g/100 g solvent) of lignocellulose in various neat ILs and EA-superbase mixtures at 90 °C.

| Solvent systems | Solubility <sup>a</sup> |
|-----------------|-------------------------|
| EA-DBN          | < 1.0                   |
| EA-DBU          | < 1.0                   |
| EA-TMG          | < 1.0                   |
| EmimOAc         | 1.5 ( $\pm 0.15$ )      |
| PmimOAc         | 1.0 ( $\pm 0.15$ )      |
| BmimOAc         | < 1.0                   |
| AmimOAc         | < 1.0                   |
| EmimCl          | < 1.0                   |
| PmimCl          | < 1.0                   |
| BmimCl          | < 1.0                   |
| AmimCl          | < 1.0                   |

<sup>a</sup>Values of solubility were the average of twice measurements.

**Table S2** Solubilities (g/100 g solvent) of lignocellulose in various IL/EA-superbase systems (1:1) at 90 °C.

| Solvent systems | Solubility <sup>a</sup> | Solvent systems | Solubility <sup>a</sup> | Solvent systems | Solubility <sup>a</sup> |
|-----------------|-------------------------|-----------------|-------------------------|-----------------|-------------------------|
| EmimOAc/EA-DBN  | 9.5 (±0.35)             | EmimOAc/EA-DBU  | 8.6 (±0.30)             | EmimOAc/EA-TMG  | 7.0 (±0.25)             |
| PmimOAc/EA-DBN  | 9.0 (±0.32)             | PmimOAc/EA-DBU  | 8.1 (±0.30)             | PmimOAc/EA-TMG  | 6.6 (±0.22)             |
| BmimOAc/EA-DBN  | 3.2 (±0.15)             | BmimOAc/EA-DBU  | 2.8 (±0.12)             | BmimOAc/EA-TMG  | < 1.0                   |
| AmimOAc/EA-DBN  | 3.0 (±0.15)             | AmimOAc/EA-DBU  | 2.2 (±0.10)             | AmimOAc/EA-TMG  | < 1.0                   |
| EmimCl/EA-DBN   | 8.0 (±0.28)             | EmimCl/EA-DBN   | - <sup>b</sup>          | EmimCl/EA-TMG   | - <sup>b</sup>          |
| PmimCl/EA-DBN   | 7.3 (±0.25)             | PmimCl/EA-DBU   | - <sup>b</sup>          | PmimCl/EA-TMG   | 1.2 (±0.12)             |
| BmimCl/EA-DBN   | 4.0 (±0.18)             | BmimCl/EA-DBU   | 3.2 (±0.15)             | BmimCl/EA-TMG   | < 1.0                   |
| AmimCl/EA-DBN   | 1.8 (±0.15)             | AmimCl/EA-DBU   | - <sup>b</sup>          | AmimCl/EA-TMG   | - <sup>b</sup>          |

<sup>a</sup>Values of solubility were the average of twice measurements.

<sup>b</sup>The solubility of lignocellulose was not detected because the IL and EA-superbase did not form a homogeneous solvent.

**Table S3** Solubilities (g/100 g solvent) of lignocellulose in various IL/EA (1:1) and IL/superbase (1:1) systems at 90 °C.

| Solvent systems | Solubility <sup>a</sup> |
|-----------------|-------------------------|-----------------|-------------------------|-----------------|-------------------------|-----------------|-------------------------|
| EmimOAc/EA      | 6.5 (±0.22)             | EmimOAc/DBN     | 4.3 (±0.18)             | EmimOAc/DBU     | - <sup>b</sup>          | EmimOAc/TMG     | - <sup>b</sup>          |
| PmimOAc/EA      | 6.2 (±0.22)             | PmimOAc/DBN     | 4.0 (±0.15)             | PmimOAc/DBU     | - <sup>b</sup>          | PmimOAc/TMG     | 1.0 (±0.10)             |
| BmimOAc/EA      | < 1.0                   | BmimOAc/DBN     | 1.2 (±0.10)             | BmimOAc/DBU     | < 1                     | BmimOAc/TMG     | - <sup>b</sup>          |
| AmimOAc/EA      | < 1.0                   | AmimOAc/DBN     | 1.0 (±0.10)             | AmimOAc/DBU     | - <sup>b</sup>          | AmimOAc/TMG     | - <sup>b</sup>          |
| EmimCl/EA       | 2.0 (±0.10)             | EmimCl/DBN      | - <sup>b</sup>          | EmimCl/DBU      | - <sup>b</sup>          | EmimCl/TMG      | - <sup>b</sup>          |
| PmimCl/EA       | 1.0 (±0.10)             | PmimCl/DBN      | - <sup>b</sup>          | PmimCl/DBU      | - <sup>b</sup>          | PmimCl/TMG      | - <sup>b</sup>          |
| BmimCl/EA       | < 1.0                   | BmimCl/DBN      | 3.0 (±0.18)             | BmimCl/DBU      | - <sup>b</sup>          | BmimCl/TMG      | - <sup>b</sup>          |
| AmimCl/EA       | 1.0 (±0.10)             | AmimCl/DBN      | - <sup>b</sup>          | AmimCl/DBU      | - <sup>b</sup>          | AmimCl/TMG      | - <sup>b</sup>          |

<sup>a</sup>Values of solubility were the average of twice measurements.

<sup>b</sup>The solubility of lignocellulose was not detected because the IL and the superbase did not form a homogeneous solvent.

**Table S4** Solubilities (g/100 g solvent) of lignocellulose in different IL/EA-superbase systems (1:1) at different temperatures.

| Solvent systems | Solubility <sup>a</sup> |             |             |
|-----------------|-------------------------|-------------|-------------|
|                 | 70 °C                   | 80 °C       | 90 °C       |
| EmimOAc/EA-DBN  | 4.5 (±0.16)             | 7.0 (±0.25) | 9.5 (±0.35) |
| PmimOAc/EA-DBN  | 2.3 (±0.10)             | 5.5 (±0.2)  | 9.0 (±0.35) |
| EmimCl/EA-DBN   | 3.6 (±0.15)             | 6.0 (±0.22) | 8.0 (±0.3)  |
| PmimCl/EA-DBN   | 2.5 (±0.1)              | 5.0 (±0.2)  | 7.3 (±0.25) |
| EmimOAc/EA-DBU  | 4.0 (±0.18)             | 6.0 (±0.25) | 8.6 (±0.35) |
| EmimOAc/EA-TMG  | 3.0 (±0.15)             | 4.8 (±0.2)  | 7.0 (±0.25) |

<sup>a</sup>Values of solubility were the average of twice measurements.

**Table S5** Solubilities (g/100 g solvent) of lignocellulose in EmimOAc/EA-DBN systems with varied molar ratios at 90 °C.

| Molar ratio | Solubility <sup>a</sup> |
|-------------|-------------------------|
| 1:0         | 1.5 (±0.15)             |
| 5:1         | 4.0 (±0.2)              |
| 4:1         | 6.0 (±0.28)             |
| 3:1         | 7.4 (±0.3)              |
| 2:1         | 8.5 (±0.32)             |
| 1:1         | 9.5 (±0.35)             |
| 1:2         | 9.0 (±0.35)             |
| 1:3         | 6.5 (±0.28)             |
| 1:4         | 3.6 (±0.2)              |
| 1:5         | 1.7 (±0.15)             |
| 0:1         | < 1                     |

<sup>a</sup>Values of solubility were the average of twice measurements.

**Table S6** Chemical composition of sugarcane bagasse before and after pretreatment and the solubilities (g/100 g solvent) of treated lignocellulosic samples in EmimOAc/EA-DBN systems at different temperatures.

| Samples                        | Residue yield (wt%) | Composition of samples (wt%) |               |        | Lignin removal (%) | Hemicellulose removal (%) | Solubility <sup>a</sup> (g/100 g solvent) |              |              |
|--------------------------------|---------------------|------------------------------|---------------|--------|--------------------|---------------------------|-------------------------------------------|--------------|--------------|
|                                |                     | Cellulose                    | Hemicellulose | Lignin |                    |                           | 70 °C                                     | 80 °C        | 90 °C        |
| Raw                            | -                   | 40.04                        | 26.49         | 21.94  | -                  | -                         | 4.5 (±0.16)                               | 7.0 (±0.25)  | 9.5 (±0.35)  |
| HF-lignocellulose <sup>b</sup> | 60.5                | 61.78                        | 6.26          | 33.67  | 7.15               | 85.74                     | 6.4 (±0.20)                               | 8.2 (±0.2)   | 11.8 (±0.42) |
| LF-lignocellulose <sup>c</sup> | 65.15               | 58.12                        | 34.80         | 5.34   | 84.15              | 14.41                     | 8.5 (±0.30)                               | 11.2 (±0.38) | 15.0 (±0.45) |

<sup>a</sup>Values of solubility were the average of twice measurements.

<sup>b</sup>Sample was obtained by hydrothermal pretreatment at 190 °C for 20 min.

<sup>c</sup>Sample was obtained by sodium chlorite pretreatment.

**Table S7** Solubilities (g/100 g solvent) of various lignocellulosic biomass in EmimOAc/EA-DBN system at 90 °C.

| Lignocellulose              | Solubility <sup>a</sup> |
|-----------------------------|-------------------------|
| <i>Miscanthus giganteus</i> | 20.0 (±1.2)             |
| Sorghum straw               | 14.6 (±0.8)             |
| Corn cob                    | 10.3 (±0.5)             |
| Sugarcane bagasse           | 9.5 (±0.35)             |
| Moso bamboo                 | 9.2 (±0.4)              |
| Wheat straw                 | 5.5 (±0.5)              |
| Rice straw                  | 5 (±0.5)                |
| <i>Populus tomentosa</i>    | 3.8 (±0.3)              |
| <i>Pinus radiata</i>        | 3.2 (±0.3)              |

<sup>a</sup>Values of solubility were the average of twice measurements.



**Table S8** The Kamlet-Taft parameters of IL/EA-DBN (1:1, mol/mol) systems and the parent solvent (neat ILs and EA-DBN).

| Solvent systems | Kamlet-Taft parameters <sup>a</sup> |              |              |
|-----------------|-------------------------------------|--------------|--------------|
|                 | $\alpha$                            | $\beta$      | $\pi^*$      |
| EmimOAc         | 0.49                                | 1.09         | 1.06         |
| PmimOAc         | 0.46                                | 0.99         | 1.06         |
| BmimOAc         | 0.47                                | 1.01         | 1.01         |
| AmimOAc         | 0.48                                | 0.99         | 1.08         |
| EmimCl          | <sub>b</sub>                        | <sub>b</sub> | <sub>b</sub> |
| PmimCl          | <sub>b</sub>                        | <sub>b</sub> | <sub>b</sub> |
| BmimCl          | <sub>b</sub>                        | <sub>b</sub> | <sub>b</sub> |
| AmimCl          | 0.46                                | 0.83         | 1.17         |
| EA-DBN          | 0.81                                | 1.00         | 0.91         |
| EmimOAc/EA-DBN  | 0.51                                | 1.12         | 1.00         |
| PmimOAc/EA-DBN  | 0.56                                | 1.10         | 0.96         |
| BmimOAc/EA-DBN  | 0.63                                | 1.01         | 1.04         |
| AmimOAc/EA-DBN  | 0.63                                | 0.99         | 1.04         |
| EmimCl/EA-DBN   | 0.52                                | 0.97         | 1.06         |
| PmimCl/EA-DBN   | 0.57                                | 0.97         | 1.06         |
| BmimCl/EA-DBN   | 0.62                                | 0.97         | 1.02         |
| AmimCl/EA-DBN   | 0.68                                | 0.94         | 1.02         |

<sup>a</sup>The value of the corresponding Kamlet-Taft parameter was the average of twice measurements. <sup>b</sup>The ILs were solid at room temperature and cannot be tested.

**Table S9** Result of K-T parameters LSER fits for the lignocellulose solubility in different of IL/EA-DBN systems.<sup>a</sup>

| Solvent systems          | Parameters     | LSER equation                    | p-values                          |
|--------------------------|----------------|----------------------------------|-----------------------------------|
| Acetate-based IL/EA-DBN  | $\alpha$       | $\ln S=7.64-10.24\alpha$         | $XYZ_0=0.033, \alpha=0.052$       |
|                          | $\beta$        | $\ln S=-8.57+9.27\beta$          | $XYZ_0=0.011, \beta=0.008$        |
|                          | $\beta-\alpha$ | $\ln S=-0.72+5.07(\beta-\alpha)$ | $XYZ_0=0.182, \beta-\alpha=0.021$ |
| Chloride-based IL/EA-DBN | $\alpha$       | $\ln S=-7.29-9.67\alpha$         | $XYZ_0=0.024, \alpha=0.036$       |
|                          | $\beta$        | $\ln S=-37.95+41.00\beta$        | $XYZ_0=0.113, \beta=0.105$        |
|                          | $\beta-\alpha$ | $\ln S=-1.52+8.32(\beta-\alpha)$ | $XYZ_0=0.075, \beta-\alpha=0.020$ |

<sup>a</sup>In this work, a maximum p value was 0.05, if values proved statistically significant ( $p < 0.05$ ), the correlation was accepted.

**Table S10** Density ( $\rho$ ), viscosity ( $\eta$ ), conductivity ( $\sigma$ ) and molar conductivity ( $\Lambda$ ) of IL/EA-DBN systems at different temperatures.

| Solvent systems | $\rho$ (g·cm <sup>-3</sup> ) |       |       | $\eta$ (mPa·s) |                |                | $\sigma$ (mS·cm <sup>-1</sup> ) |                |                | $\Lambda$ (S·cm <sup>2</sup> ·mol <sup>-1</sup> ) |                |                |
|-----------------|------------------------------|-------|-------|----------------|----------------|----------------|---------------------------------|----------------|----------------|---------------------------------------------------|----------------|----------------|
|                 | 30 °C                        | 50 °C | 70 °C | 30 °C          | 50 °C          | 70 °C          | 30 °C                           | 50 °C          | 70 °C          | 30 °C                                             | 50 °C          | 70 °C          |
| EmimOAc         | 1.098                        | 1.087 | 1.074 | 120.52         | 52.95          | 24.50          | 2.970                           | 4.978          | 7.776          | 0.460                                             | 0.779          | 1.232          |
| EmimOAc/EA-DBN  | 1.063                        | 1.050 | 1.038 | 54.03          | 30.50          | 18.80          | 4.401                           | 5.894          | 7.490          | 0.491                                             | 0.665          | 0.855          |
| PmimOAc         | 1.079                        | 1.069 | 1.057 | 252.00         | 120.80         | 60.45          | 1.217                           | 2.105          | 3.695          | 0.208                                             | 0.363          | 0.644          |
| PmimOAc/EA-DBN  | 1.055                        | 1.044 | 1.034 | 60.10          | 36.13          | 25.87          | 2.723                           | 4.017          | 5.148          | 0.318                                             | 0.474          | 0.613          |
| BmimOAc         | 1.091                        | 1.080 | 1.068 | 509.87         | 266.60         | 113.00         | 0.515                           | 0.921          | 1.712          | 0.094                                             | 0.169          | 0.318          |
| BmimOAc/EA-DBN  | 1.062                        | 1.050 | 1.037 | 302.90         | 144.10         | 77.87          | 1.118                           | 1.960          | 3.208          | 0.142                                             | 0.239          | 0.395          |
| AmimOAc         | 1.110                        | 1.099 | 1.087 | 392.25         | 205.80         | 95.95          | 0.753                           | 1.210          | 2.356          | 0.124                                             | 0.201          | 0.395          |
| AmimOAc/EA-DBN  | 1.070                        | 1.059 | 1.048 | 162.60         | 95.5           | 55.90          | 1.549                           | 2.513          | 3.744          | 0.177                                             | 0.291          | 0.438          |
| EmimCl          | 1.111                        | 1.094 | 1.078 | - <sup>a</sup> | - <sup>a</sup> | - <sup>a</sup> | - <sup>a</sup>                  | - <sup>a</sup> | - <sup>a</sup> | - <sup>a</sup>                                    | - <sup>a</sup> | - <sup>a</sup> |
| EmimCl/EA-DBN   | 1.066                        | 1.056 | 1.044 | 94.95          | 54.40          | 25.00          | 3.433                           | 4.851          | 7.294          | 0.356                                             | 0.508          | 0.773          |
| PmimCl          | 1.078                        | 1.062 | 1.046 | - <sup>a</sup> | - <sup>a</sup> | - <sup>a</sup> | - <sup>a</sup>                  | - <sup>a</sup> | - <sup>a</sup> | - <sup>a</sup>                                    | - <sup>a</sup> | - <sup>a</sup> |
| PmimCl/EA-DBN   | 1.061                        | 1.050 | 1.039 | 112.05         | 65.07          | 37.73          | 2.179                           | 3.536          | 5.226          | 0.237                                             | 0.388          | 0.580          |
| BmimCl          | 1.079                        | 1.063 | 1.048 | - <sup>a</sup> | - <sup>a</sup> | - <sup>a</sup> | - <sup>a</sup>                  | - <sup>a</sup> | - <sup>a</sup> | - <sup>a</sup>                                    | - <sup>a</sup> | - <sup>a</sup> |
| BmimCl/EA-DBN   | 1.055                        | 1.045 | 1.033 | 144.65         | 73.40          | 40.93          | 1.733                           | 2.731          | 4.215          | 0.197                                             | 0.314          | 0.490          |
| AmimCl          | 1.127                        | 1.116 | 1.104 | 701.00         | 352.70         | 182.00         | 0.601                           | 1.049          | 1.915          | 0.085                                             | 0.149          | 0.275          |
| AmimCl/EA-DBN   | 1.074                        | 1.063 | 1.051 | 223.95         | 131.60         | 75.77          | 1.827                           | 2.821          | 4.553          | 0.195                                             | 0.304          | 0.497          |

<sup>a</sup>The ILs were solid at this temperature and cannot be tested.

**Table S11** Ionicity of each investigated solvent systems depending on temperature.

| Solvent systems | % Ionicity     |                |                |
|-----------------|----------------|----------------|----------------|
|                 | 30 °C          | 50 °C          | 70 °C          |
| EmimOAc         | 55.4           | 41.2           | 30.2           |
| EmimOAc/EA-DBN  | 26.5           | 20.3           | 16.1           |
| PmimOAc         | 52.4           | 43.8           | 38.9           |
| PmimOAc/EA-DBN  | 19.1           | 17.1           | 15.8           |
| BmimOAc         | 47.7           | 45.1           | 35.9           |
| BmimOAc/EA-DBN  | 43.0           | 34.4           | 30.7           |
| AmimOAc         | 48.5           | 41.3           | 37.9           |
| AmimOAc/EA-DBN  | 28.8           | 27.8           | 24.5           |
| EmimCl          | - <sup>a</sup> | - <sup>a</sup> | - <sup>a</sup> |
| EmimCl/EA-DBN   | 33.8           | 27.6           | 19.3           |
| PmimCl          | - <sup>a</sup> | - <sup>a</sup> | - <sup>a</sup> |
| PmimCl/EA-DBN   | 26.5           | 25.2           | 21.9           |
| BmimCl          | - <sup>a</sup> | - <sup>a</sup> | - <sup>a</sup> |
| BmimCl/EA-DBN   | 28.5           | 23.0           | 20.1           |
| AmimCl          | 59.3           | 52.6           | 50.1           |
| AmimCl/EA-DBN   | 43.6           | 40.0           | 37.6           |

<sup>a</sup>The ILs were solid at this temperature and cannot be tested.

**Table S12** Assignments of  $^1\text{H}$ - $^{13}\text{C}$  overlapped signals in 2D-NMR spectra of Sugarcane

bagasse and regenerated sugarcane bagasse.

| <b>Lable</b>                                                                | $\delta_{\text{C}}/\delta_{\text{H}}$ (ppm) <sup>a</sup> | $\delta_{\text{C}}/\delta_{\text{H}}$ (ppm) <sup>b</sup> | <b>Assignments</b>                                                                                                           |
|-----------------------------------------------------------------------------|----------------------------------------------------------|----------------------------------------------------------|------------------------------------------------------------------------------------------------------------------------------|
| OMe                                                                         | 55.25/3.77                                               | 55.41/3.64                                               | C-H in methoxyls                                                                                                             |
| A <sub><math>\alpha</math></sub>                                            | 71.85/5.02                                               | 72.69/5.35                                               | C <sub><math>\alpha</math></sub> -H <sub><math>\alpha</math></sub> in $\beta$ -O-4 substructures                             |
| A <sub><math>\beta</math></sub> (S)                                         | 85.95/4.24                                               | 86.33/4.08                                               | C <sub><math>\beta</math></sub> -H <sub><math>\beta</math></sub> in $\beta$ -O-4 substructures linked to S unit              |
| S <sub>2,6</sub>                                                            | 103.50/6.88                                              | 104.10/6.72                                              | C <sub>2,6</sub> -H <sub>2,6</sub> in syringyl units                                                                         |
| G <sub>2</sub>                                                              | 110.81/7.14                                              | 111.40/7.00                                              | C <sub>2</sub> -H <sub>2</sub> in guaiacyl units                                                                             |
| G <sub>5</sub>                                                              | 115.20/6.90                                              | 115.30/6.77                                              | C <sub>5</sub> -H <sub>5</sub> in guaiacyl units                                                                             |
| G <sub>6</sub>                                                              | 119.09/6.92                                              | 119.17/6.81                                              | C <sub>6</sub> -H <sub>6</sub> in guaiacyl units                                                                             |
| H <sub>2,6</sub>                                                            | 127.50/7.20                                              | ND                                                       | C <sub>2,6</sub> -H <sub>2,6</sub> in <i>p</i> -hydroxyphenyl units                                                          |
| <i>p</i> CA <sub>2,6</sub>                                                  | 129.82/7.56                                              | 129.42/7.41                                              | C <sub>2,6</sub> -H <sub>2,6</sub> in <i>p</i> -coumarate                                                                    |
| <i>p</i> CA <sub><math>\alpha</math></sub>                                  | 144.45/7.67                                              | 144.93/7.57                                              | C <sub><math>\alpha</math></sub> -H <sub><math>\alpha</math></sub> in <i>p</i> -coumarate                                    |
| <i>p</i> CA <sub><math>\beta</math></sub> +FA <sub><math>\beta</math></sub> | 114.25/6.51                                              | 114.75/6.49                                              | C <sub><math>\beta</math></sub> -H <sub><math>\beta</math></sub> in <i>p</i> -coumarate and ferulate                         |
| FA <sub>2</sub>                                                             | 110.81/7.45                                              | 110.81/7.28                                              | C <sub>2</sub> -H <sub>2</sub> in ferulate                                                                                   |
| FA <sub>6</sub>                                                             | 123.48/7.08                                              | 123.33/7.00                                              | C <sub>6</sub> -H <sub>6</sub> in ferulate                                                                                   |
| C <sub>1</sub>                                                              | ND                                                       | 105.51/4.35                                              | C <sub>1</sub> -H <sub>1</sub> in cellulose internal unit                                                                    |
| C <sub>2</sub>                                                              | 73.10/3.08                                               | 73.11/3.15                                               | C <sub>2</sub> -H <sub>2</sub> in cellulose internal unit                                                                    |
| C <sub>3</sub>                                                              | 73.25/3.58                                               | 73.30/3.60                                               | C <sub>3</sub> -H <sub>3</sub> in cellulose internal unit                                                                    |
| C <sub>4</sub>                                                              | 80.02/3.53                                               | 79.58/3.45                                               | C <sub>4</sub> -H <sub>4</sub> in cellulose internal unit                                                                    |
| C <sub>5</sub>                                                              | 76.30/3.25                                               | 76.35/3.28                                               | C <sub>5</sub> -H <sub>5</sub> in cellulose internal unit                                                                    |
| C <sub>6</sub>                                                              | 60.12/3.77                                               | 59.54/3.76                                               | C <sub>6</sub> -H <sub>6</sub> in cellulose internal unit                                                                    |
| X <sub>1</sub>                                                              | 101.55/4.44                                              | 101.67/4.30                                              | C <sub>1</sub> -H <sub>1</sub> in $\beta$ -D-xylopyranoside                                                                  |
| X <sub>2</sub>                                                              | 73.28/3.41                                               | 72.70/3.13                                               | C <sub>2</sub> -H <sub>2</sub> in $\beta$ -D-xylopyranoside                                                                  |
| X <sub>3</sub>                                                              | 73.77/3.46                                               | 73.91/3.34                                               | C <sub>3</sub> -H <sub>3</sub> in $\beta$ -D-xylopyranoside                                                                  |
| X <sub>4</sub>                                                              | 74.74/3.67                                               | 75.13/3.56                                               | C <sub>4</sub> -H <sub>4</sub> in $\beta$ -D-xylopyranoside                                                                  |
| X <sub>5ax</sub>                                                            | 63.04/3.32                                               | 63.20/3.19                                               | C <sub>5ax</sub> -H <sub>5ax</sub> in $\beta$ -D-xylopyranoside                                                              |
| X <sub>5eq</sub>                                                            | 63.04/4.04                                               | 63.20/3.90                                               | C <sub>5eq</sub> -H <sub>5eq</sub> in $\beta$ -D-xylopyranoside                                                              |
| X <sub>NR5</sub>                                                            | 65.97/3.90                                               | 65.54/3.69                                               | C <sub>5</sub> -H <sub>5</sub> in $\beta$ -D-xylopyranoside (non-reducing end)                                               |
| Ara <sub>1</sub>                                                            | ND                                                       | 107.27/5.47                                              | C <sub>1</sub> -H <sub>1</sub> in arabinan                                                                                   |
| Ara <sub>2</sub>                                                            | 81.08/4.06                                               | 80.24/3.92                                               | C <sub>2</sub> -H <sub>2</sub> in arabinan                                                                                   |
| Ara <sub>3</sub>                                                            | 78.06/3.83                                               | 77.81/3.72                                               | C <sub>3</sub> -H <sub>3</sub> in arabinan                                                                                   |
| Ara <sub>5</sub>                                                            | 66.72/3.68                                               | ND                                                       | C <sub>5</sub> -H <sub>5</sub> in arabinan                                                                                   |
| U <sub>1</sub>                                                              | ND                                                       | 97.77/5.14                                               | C <sub>1</sub> -H <sub>1</sub> in 4- <i>O</i> -methyl- $\alpha$ -D-glucuronic acid (U)                                       |
| U <sub>4</sub>                                                              | ND                                                       | 81.56/3.19                                               | C <sub>4</sub> -H <sub>4</sub> in 4- <i>O</i> -methyl- $\alpha$ -D-glucuronic acid (U)                                       |
| U:OCH <sub>3</sub>                                                          | 60.01/3.50                                               | 59.55/3.41                                               | C-H in methoxyls of 4- <i>O</i> -methyl- $\alpha$ -D-glucuronic acid                                                         |
| XU <sub>1</sub>                                                             | 98.14/4.86                                               | 98.54/4.54                                               | C <sub>1</sub> -H <sub>1</sub> in (1 $\rightarrow$ 4)- $\beta$ -D-Xylp-2- <i>O</i> -(4- <i>O</i> -methyl- $\alpha$ -D-GlcpA) |
| 2- <i>O</i> -Ac- $\beta$ -D-Xylp (2)                                        | 73.28/4.72                                               | ND                                                       | 2- <i>O</i> -acetylated $\beta$ -D-xylopyranosyl                                                                             |
| 3- <i>O</i> -Ac- $\beta$ -D-Xylp (3)                                        | 74.74/5.02                                               | ND                                                       | 3- <i>O</i> -acetylated $\beta$ -D-xylopyranosyl                                                                             |
| 2,3- <i>O</i> -Ac- $\beta$ -D-Xylp (2)                                      | 72.50/4.90                                               | 71.75/4.95                                               | 2,3- <i>O</i> -acetylated $\beta$ -D-xylopyranosyl                                                                           |

<sup>a</sup>Assignments of sugarcane bagasse  
<sup>b</sup>Assignments of regenerated sugarcane bagasse  
ND, Not detected

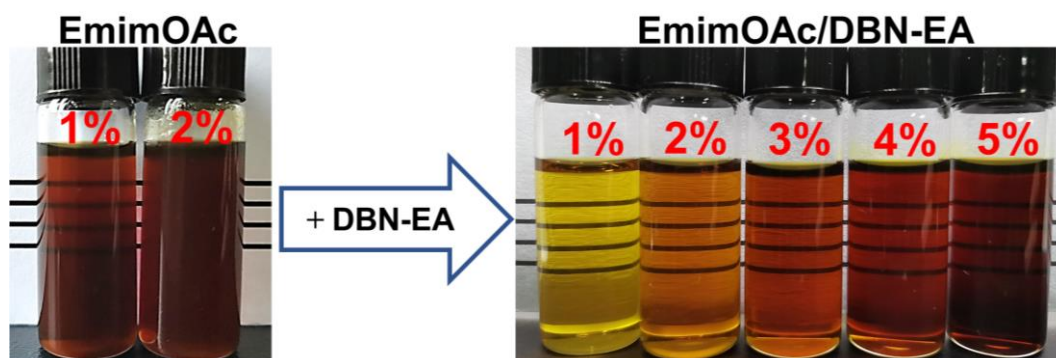

**Fig. S1** Optical pictures of lignocellulose solution in EmimOAc and EmimOAc/EA-DBN system with different concentration (g/100 g solvent).

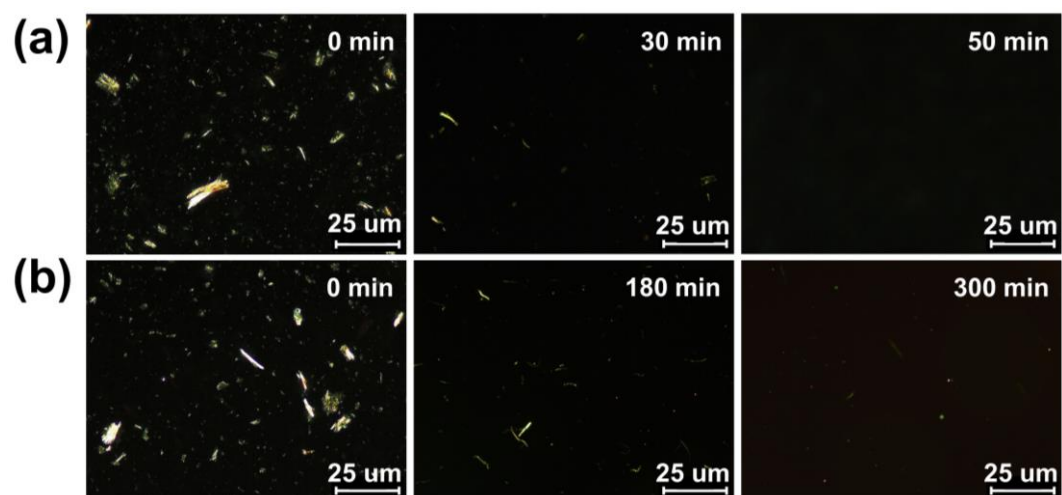

**Fig. S2** Polarized optical microscopy pictures of the dissolution process of lignocellulose (1%, w/w) in (a) EmimOAc/EA-DBN system and (b) neat EmimOAc at 90 °C.

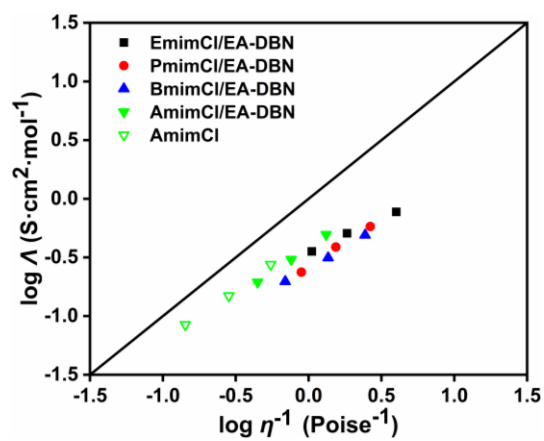

**Fig. S3** Walden plot of neat chloride anion-based ILs and chloride anion-based IL/EA-DBN systems.



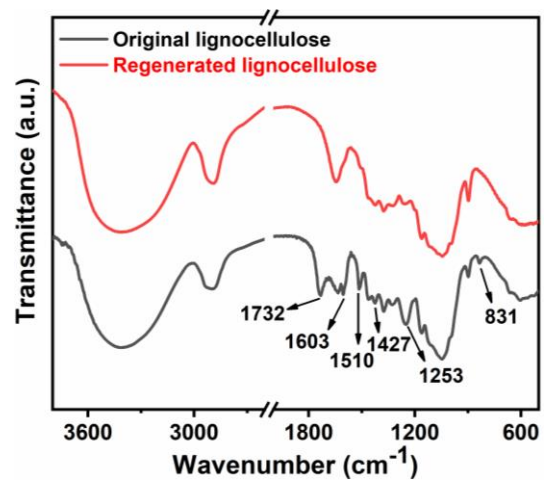

**Fig. S4** FT-IR spectra of original lignocellulose and the regenerated lignocellulose sample from EmimOAc/EA-DBN system-EA system.

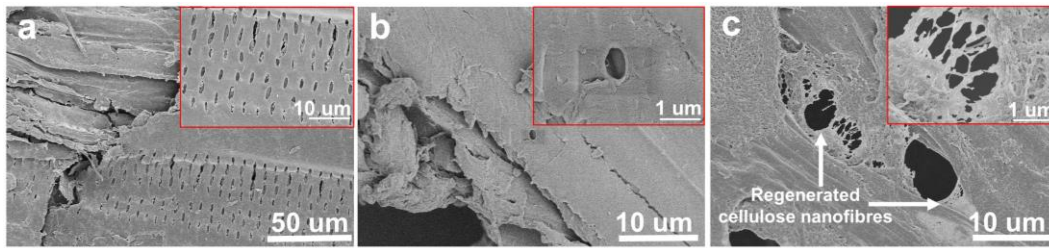

**Fig. S5** Scanning electron microscopy (SEM) images of the sugarcane bagasse (a), and the corresponding ball milled sample (b) and regenerated sample (c).

## References

1. Q. Liu, X. Zhao, D. Yu, H. Yu, Y. Zhang, Z. Xue and T. Mu, *Green Chem.*, 2019, **21**, 5291-5297.
2. M. A. Ab Rani, A. Brant, L. Crowhurst, A. Dolan, M. Lui, N. H. Hassan, J. P. Hallett, P. A. Hunt, H. Niedermeyer, J. M. Perez-Arlandis, M. Schrems, T. Welton and R. Wilding, *Phys. Chem. Chem. Phys.*, 2011, **13**, 16831.
